# Supplementary material for: Myofilament-based physiological regulatory compensation preserves diastolic function in failing hearts with severe Ca2+ handling deficits
Source: JCI journal article supplement (doi:10.1172/jci.insight.163334), 2024-02-08
Supplement: sd1 [file 1]

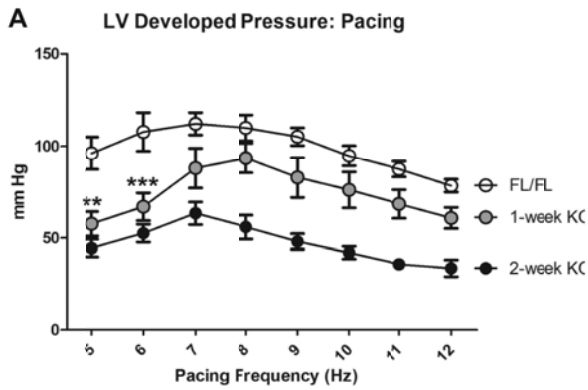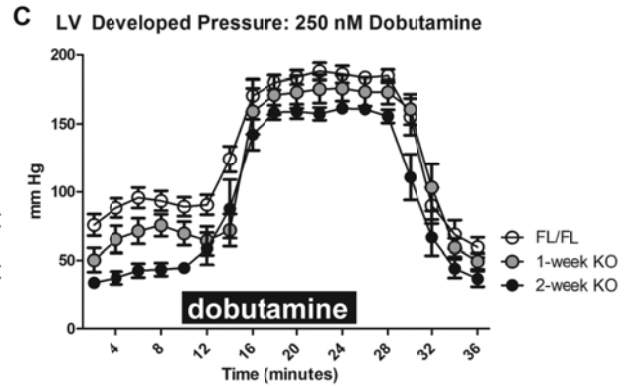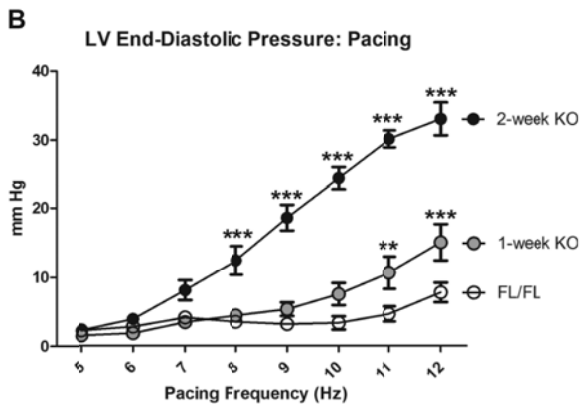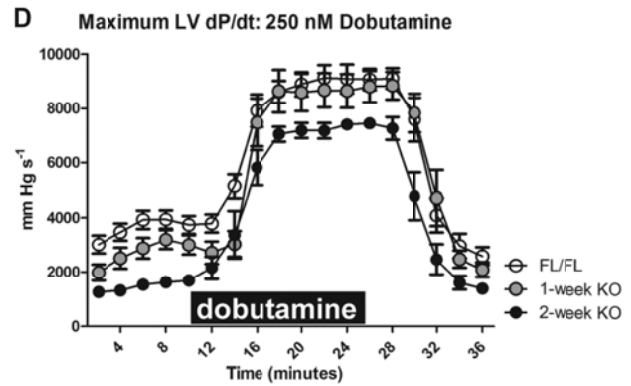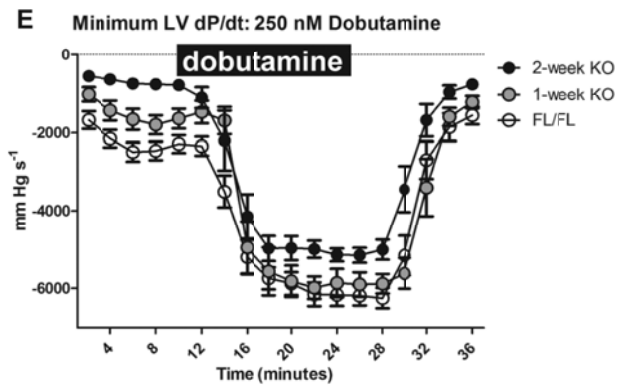

Supplemental Figure 1

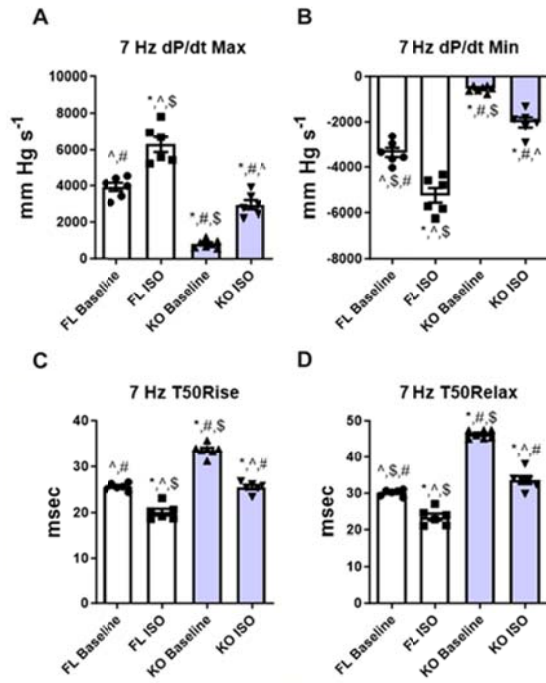

Supplemental Figure 2

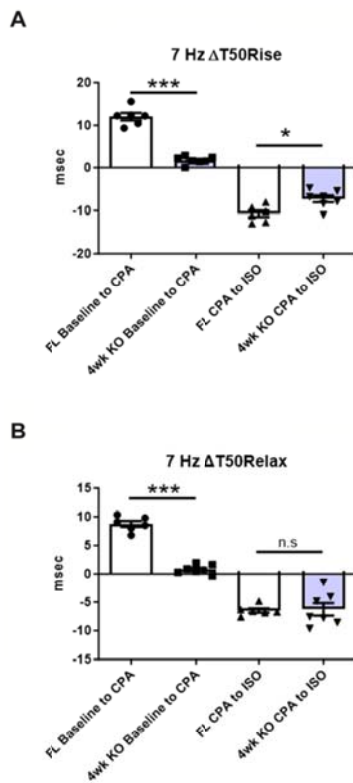

Supplemental Figure 3

**A** 7 Hz LV Developed Pressures  
PLN<sup>-/-</sup>; Serca2<sup>FL/FL</sup>

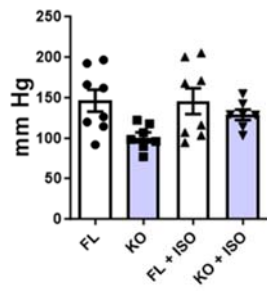

**B** 7 Hz T50Rise  
PLN<sup>-/-</sup>; Serca2<sup>FL/FL</sup>

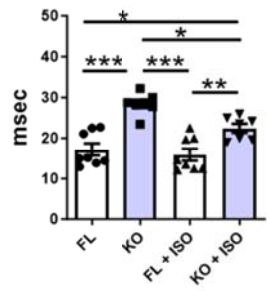

Supplemental Figure 4
